# Supplementary material for: Engineered AAA+ proteases reveal principles of proteolysis at the mitochondrial inner membrane
Source: PubMed Central journal article supplement (PMC5095350; doi:10.1038/ncomms13301), 2016-10-27
Supplement: ncomms13301-s1.pdf [file ncomms13301-s1.pdf]

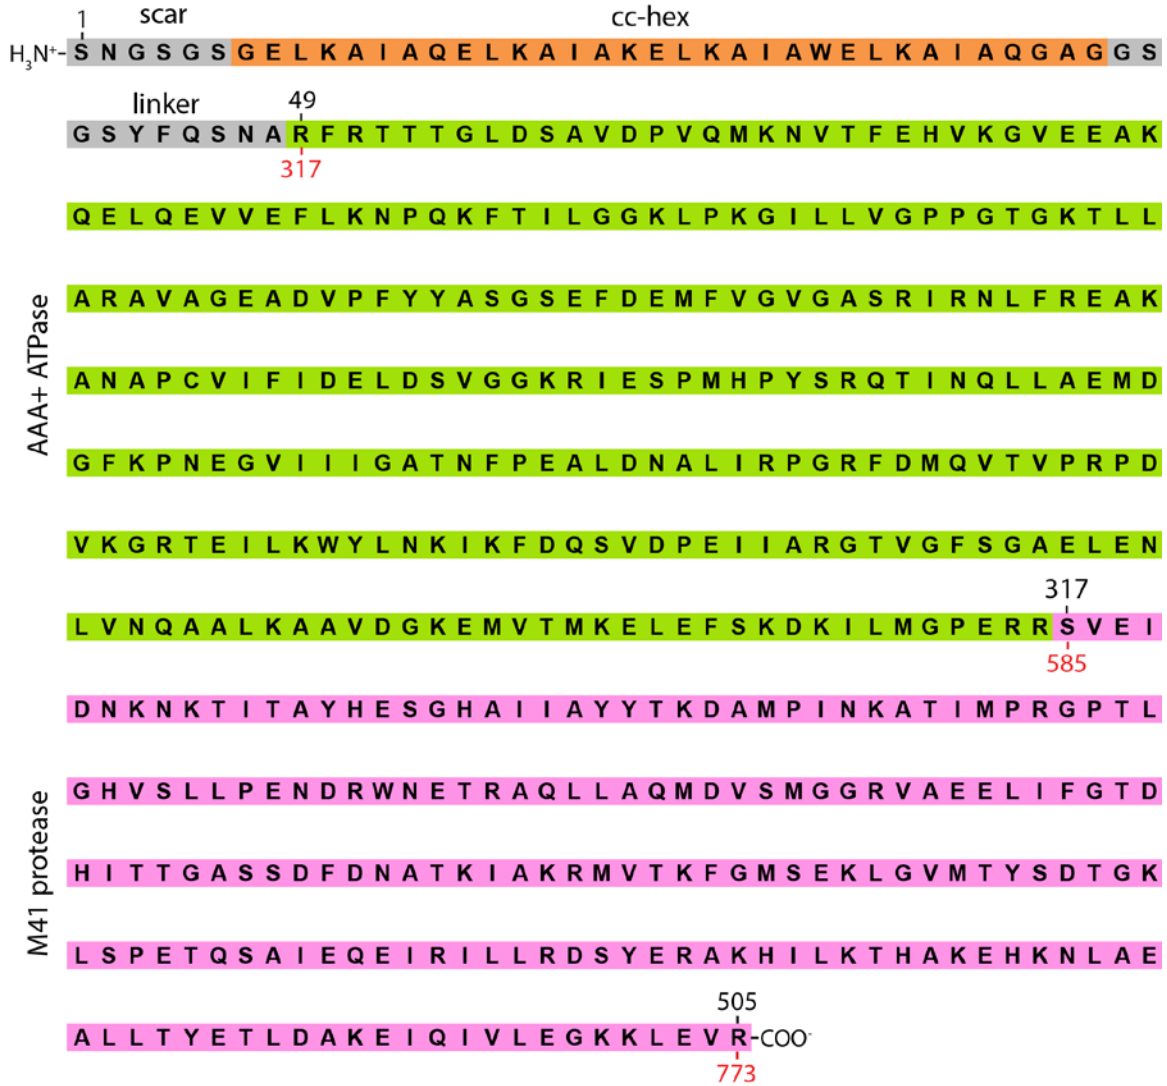

**Supplementary Figure 1. Protein sequence map of hexYME1L.**

Amino acid sequence of the hexYME1L construct showing the positions of the cc-hex sequence (orange), AAA+ ATPase domain (green), protease domain (pink) and linkers and scar produced after TEV cleavage (gray). Residue numbers correspond to the hexYME1L sequence (black) or the native YME1L protein sequence (red).

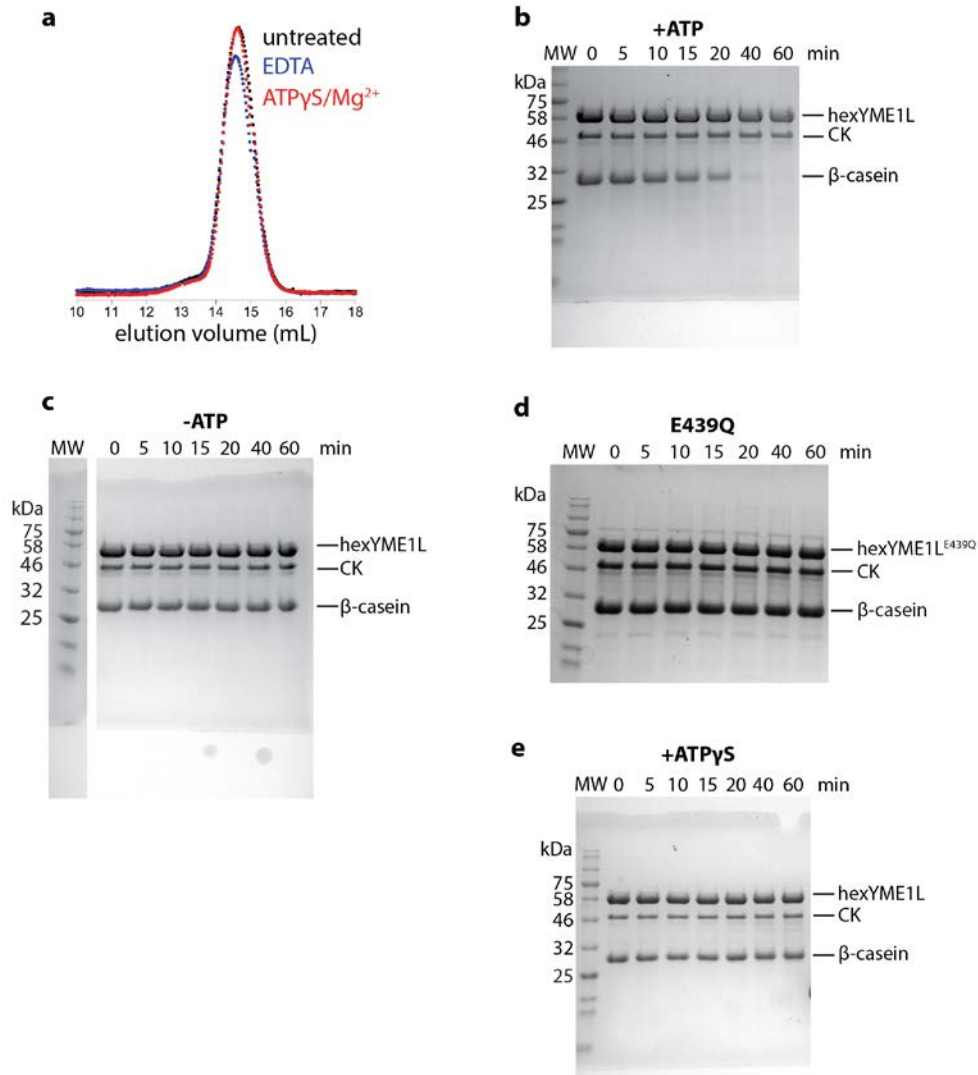

**Supplementary Figure 2. An engineered YME1L protease is active for degradation.** (a) Migration profile of hexYME1L by size-exclusion chromatography without additional treatment (black); after incubation with 5 mM EDTA to remove co-purified nucleotide (blue); in the presence of 10 mM ATP $\gamma$ S (red). (b-e) Full SDS-PAGE images for experiments in Fig. 2: (b) hexYME1L in the presence of ATP; (c) hexYME1L in the absence of ATP; (d) hexYME1L<sup>E439Q</sup> in the presence of ATP; (e) hexYME1L in the presence of ATP $\gamma$ S (5 mM). All degradation reactions contained 0.1 mg ml<sup>-1</sup> creatine kinase (CK) as a loading control.

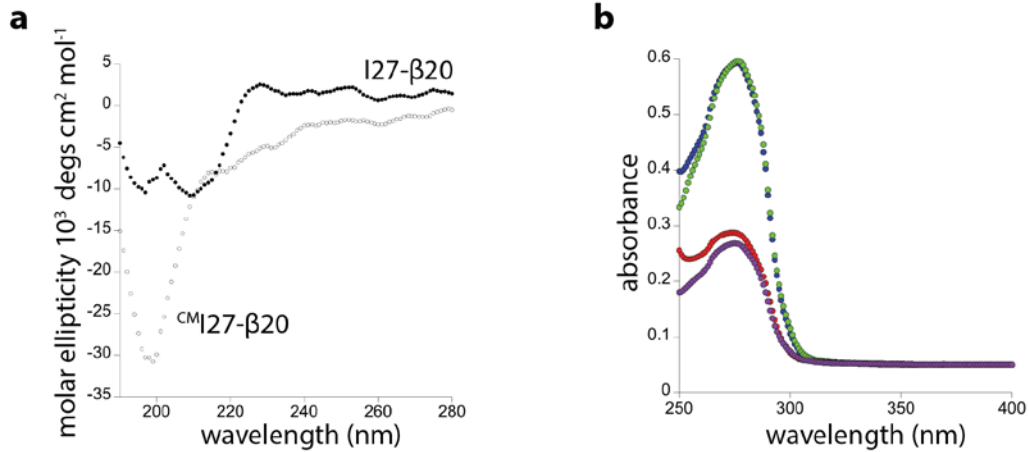

**Supplementary Figure 3. Spectroscopy of I27 variants.** (a) Circular dichroism spectra of both folded I27-β20 (filled circles) and irreversibly unfolded  $^{CM}$ I27-β20 (open circles) showing loss of secondary structure after carboxymethylation of the internal cysteine residues. (b) Light absorbance between 250 nm and 400 nm for 100 μM I27 (red circles), I27-β20 (green circles),  $^{CM}$ I27 (purple circles),  $^{CM}$ I27-β20 (blue circles).

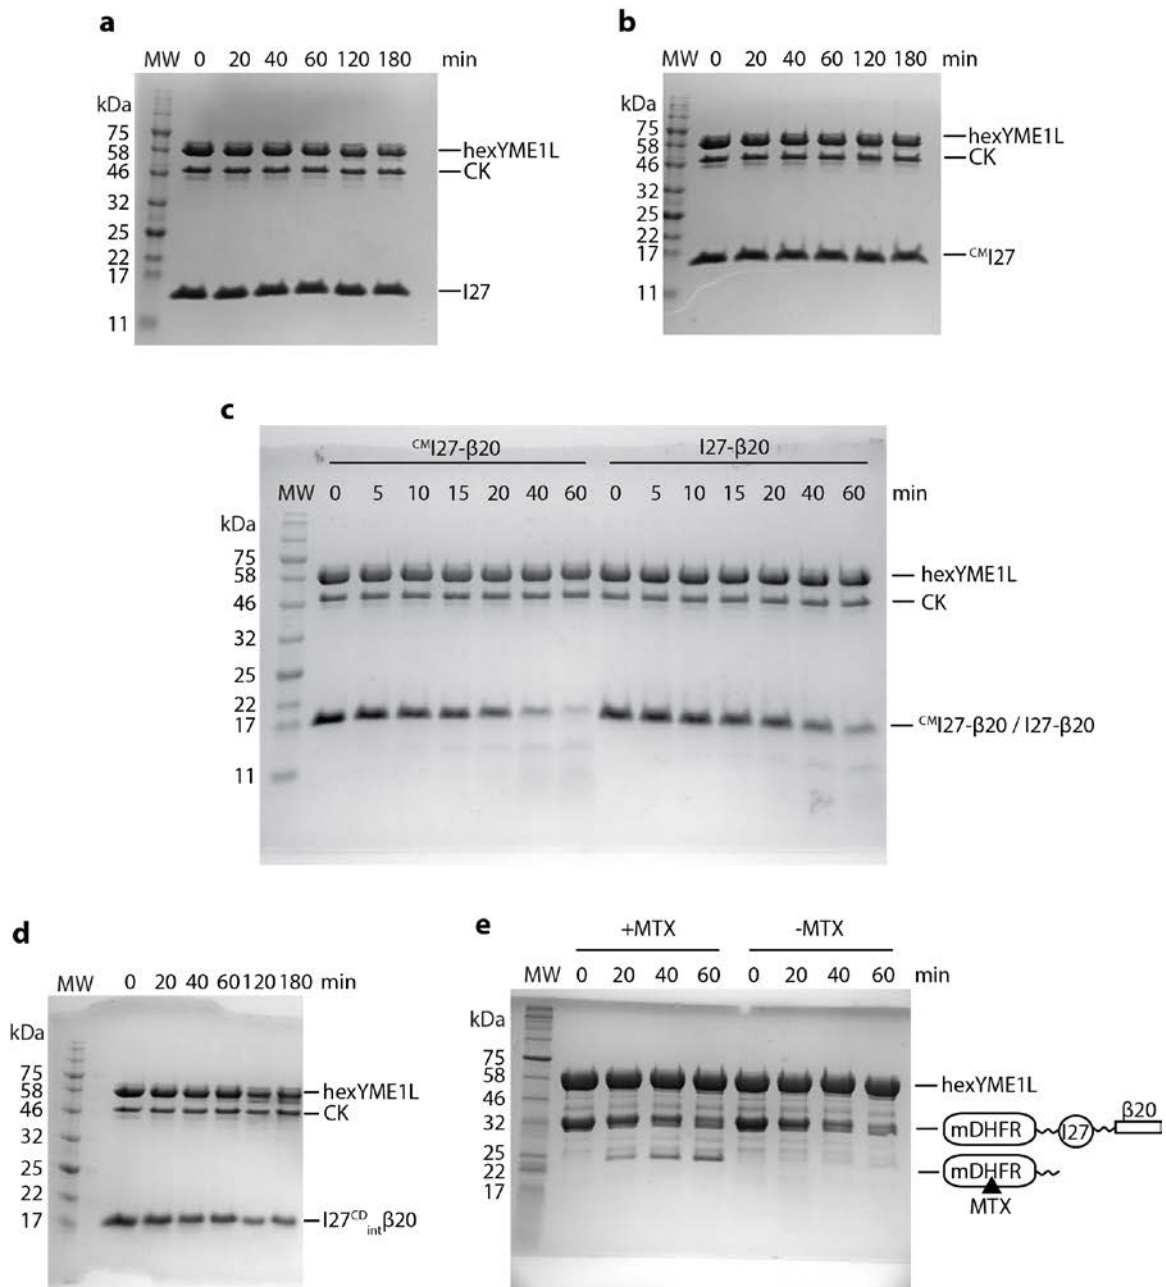

**Supplementary Figure 4. Degradation of substrates in folded and unfolded states.** Full SDS-PAGE images showing degradation of I27 variants from Fig. 3: (a) folded I27 lacking a degron in the presence of ATP; (b) unfolded <sup>CM</sup>I27 lacking a degron in the presence of ATP; (c) unfolded <sup>CM</sup>I27-β20 and folded I27-β20 in the presence of ATP; (d) I27<sup>CD</sup><sub>int</sub>β20 containing an internal degron; (e) mDHFR-I27-β20 in the presence and absence of methotrexate. All degradation reactions contained 0.1 mg ml<sup>-1</sup> creatine kinase (CK) as a loading control.

**a**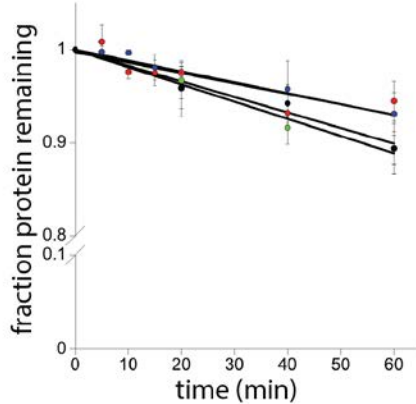**b**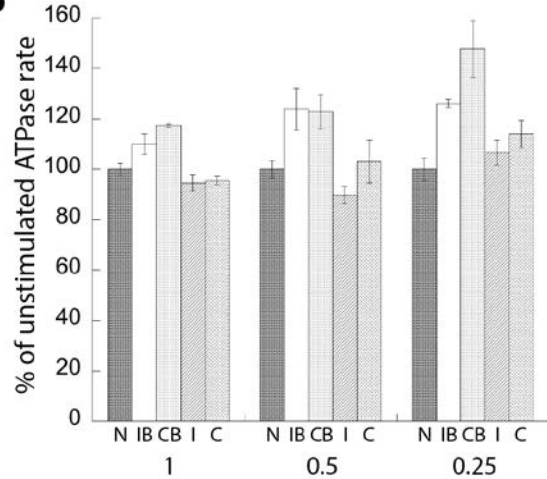

**Supplementary Figure 5. Autodegradation and ATPase stimulation of hexYME1L.** (a) Plot of loss of hexYME1L over time in the presence of <sup>CM</sup>I27-β20 (blue), I27-β20 (red), <sup>CM</sup>I27 (green), I27 (black). Loss of protease was quantified in the presence of <sup>CM</sup>I27-β20 or I27-β20 as less than 6 % in 1 h. (b) Plot showing relative stimulation of ATPase rate by the addition of substrates at varying enzyme concentrations. The degree of stimulation seen in the presence of no substrate (N), I27-β20 (IB), <sup>CM</sup>I27-β20 (CB), I27 (I) or <sup>CM</sup>I27 (C) alters when measured using 1 μM, 0.5 μM or 0.25 μM hexYME1L. All data shown are from independent experiments and all error bars indicate ± s.e.m (n=3).

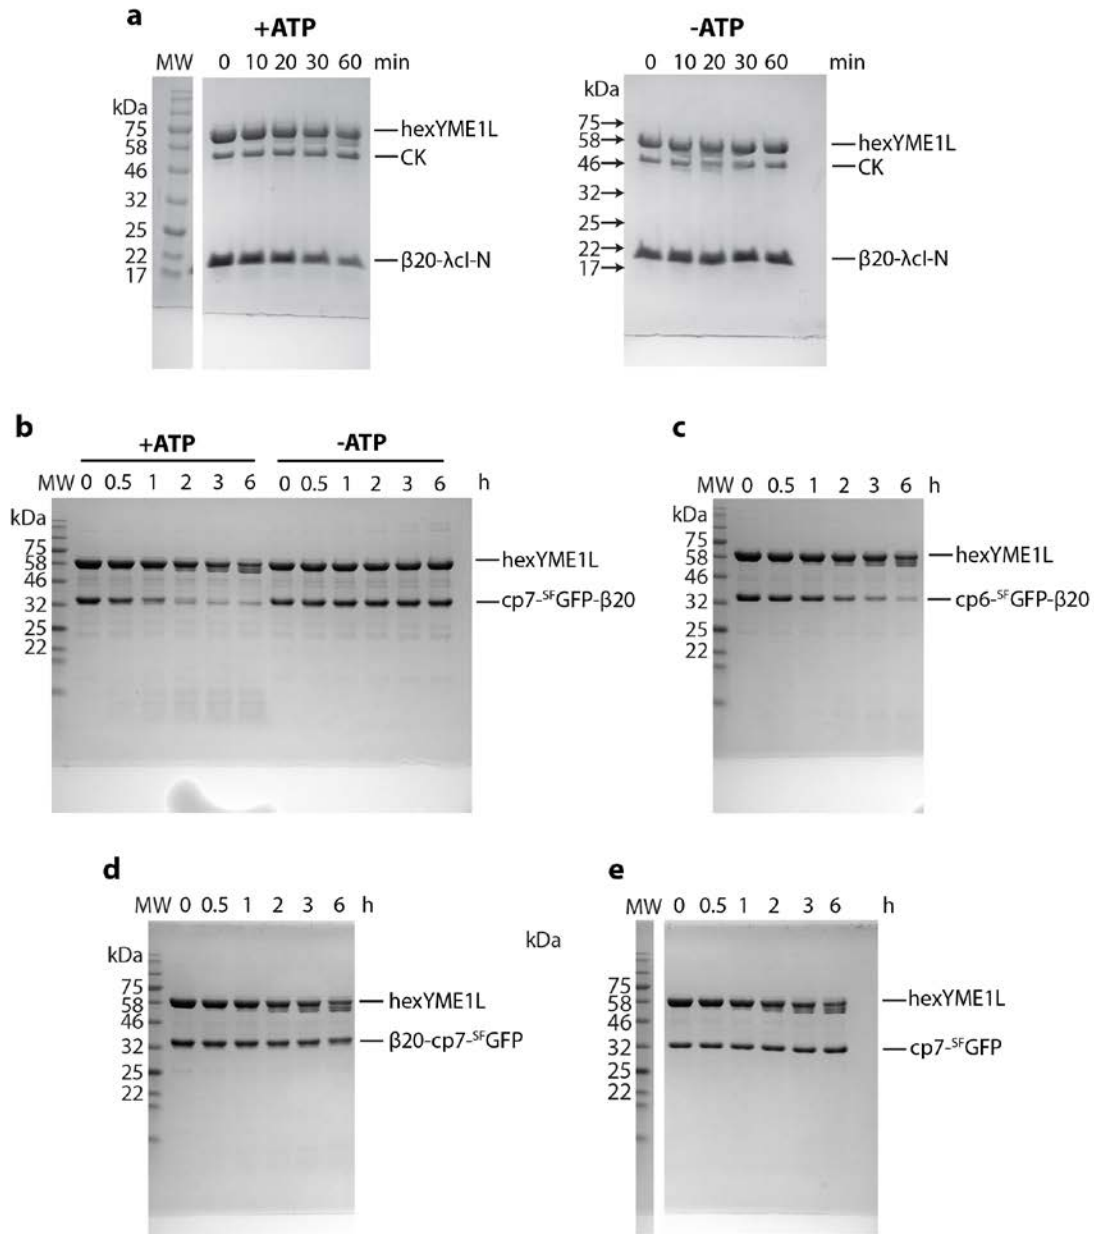

**Supplementary Figure 6. Degradation of stable proteins by hexYME1L.**

Full SDS-PAGE images showing degradation reactions from Fig. 4: (a) β20-λcl-N in the presence and absence of ATP; (b) cp7-SFGFP-β20 in the presence of ATP; (c) cp6-SFGFP-β20 in the presence of ATP; (d) β20-cp7-SFGFP in the presence of ATP; (e) cp7-SFGFP lacking a β20 degon in the presence of ATP.

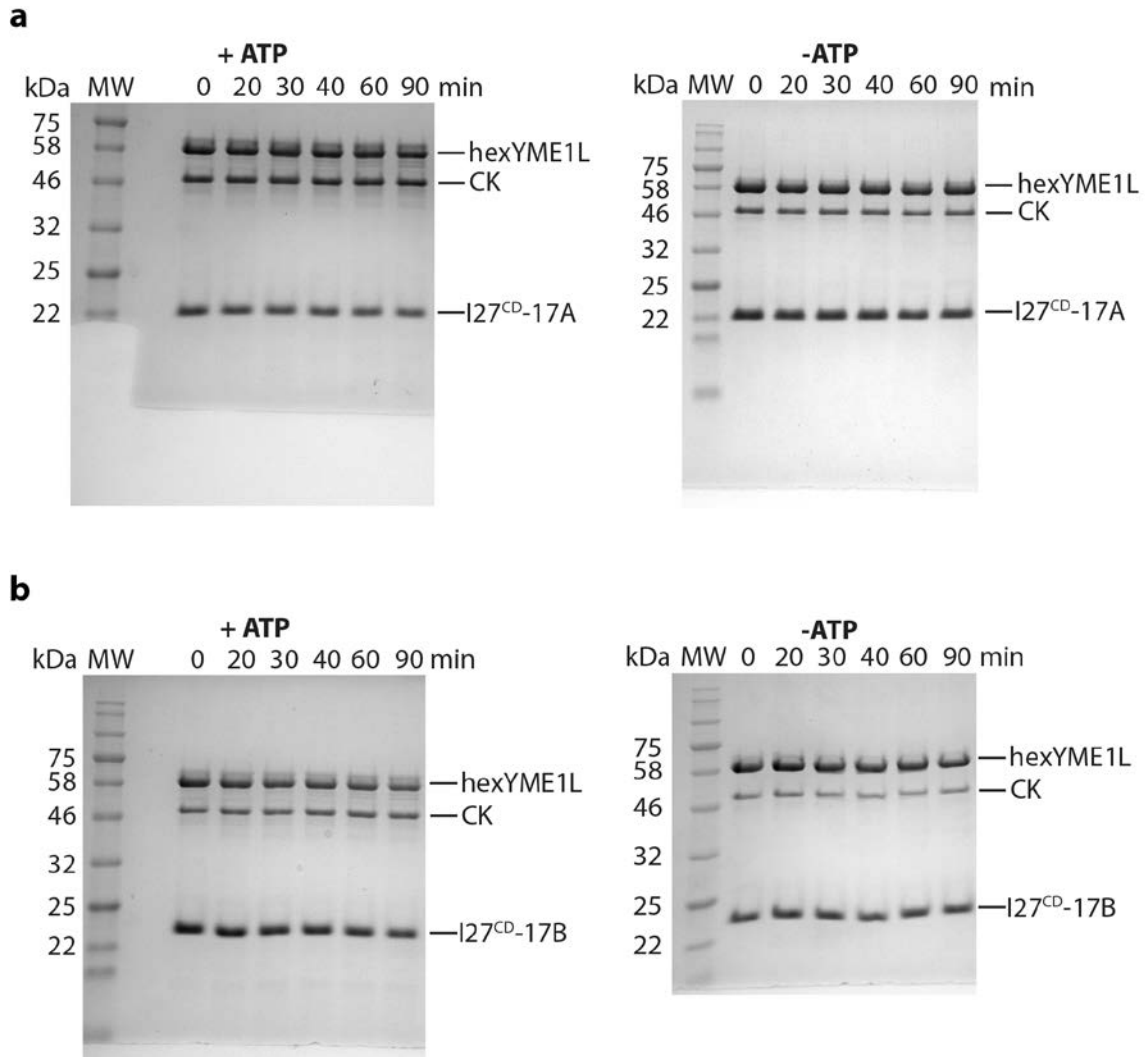

**Supplementary Figure 7. Degradation of Tim17A and Tim17B by hexYME1L.** Full SDS-PAGE images showing degradation of proteins containing sequences of human Tim17A and Tim17B from Fig. 5: (a) I27<sup>CD</sup>-Tim17A in the presence of ATP (b) I27<sup>CD</sup>-Tim17B in the presence of ATP. All reactions contained 0.1 mg ml<sup>-1</sup> creatine kinase (CK) as a loading control.

**Supplementary Table 1. F-h-h-F motifs identified in IMS proteins.**

| <b>Uniprot ID</b> | <b>Name</b> | <b>Sequence</b>      | <b>Location</b>               |
|-------------------|-------------|----------------------|-------------------------------|
| P13073            | COX41       | FIGF                 | 110-113                       |
| P36551            | HEM6        | FGLF                 | 405-408                       |
| Q8TB36            | GDAP1       | FLGF<br>FMLF         | 260-263<br>337-340            |
| Q96E52            | OMA1        | FVVF                 | 206-209                       |
| O95831            | AIFM1       | FGGF                 | 418-421                       |
| P00505            | AATM        | FAFF                 | 239-242                       |
| Q9H078            | CLPB        | FLPF                 | 568-571                       |
| Q9NRV9            | HEBP1       | FAVF                 | 84-87                         |
| O43676            | NDUB3       | FAAF                 | 75-78                         |
| Q6NUK1            | SCMC1       | FGGF                 | 235-238                       |
| O43674            | NDUB5       | FGGF                 | 29-32                         |
| O95169            | NDUB8       | FLAF<br>FMIF         | 136-139<br>139-142            |
| P00395            | COX1        | FWFF<br>FLGF<br>FPLF | 235-238<br>282-285<br>397-400 |
| Q9BPX6            | MICU1       | FALF                 | 417-420                       |
| P03915            | NU5M        | FAGF                 | 463-466                       |
| P03905            | NU4M        | FYIF                 | 118-121                       |
| O14880            | MGST3       | FLFF                 | 71-74                         |
| O14949            | QCR8        | FVVF                 | 53-56                         |
| Q9Y255            | PRLD1       | FAAF                 | 19-22                         |
| Q14257            | RCN2        | FIAF                 | 174-177                       |
| O95202            | LETM1       | FLVF                 | 212-215                       |
